# Supplementary material
Source: Springer Nature journal article supplement (https://www.springerprofessional.de/resource/supplementary/13638_2014_994_MOESM14_ESM.pdf/11898944)
Supplement: MOESM14 [file 11898944]

```
C:\> mgen.exe input server.mgn
mgen: version 5.01b
mgen: starting now ...
18:04:30.840250 START
18:04:30.840250 ON flow>1 srcPort>5001 dst>192.168.0.5/5000
18:04:34.840250 OFF flow>1 srcPort>5001 dst>192.168.0.5/5000
18:04:34.840250 STOP
Program Finished - Hit <Enter> to exit
```

Start of the mgen server

*0.0 ON 1 UDP SRC 5001 DST 192.168.0.5/5000 PERIODIC [100.0 1250] COUNT 200 QUEUE -1*

Mgen command used in the test

```
C:\> mgen.exe input example_client.mgn LOG log.dst
mgen: version 4.2b4
mgen: starting now ...
Program Finished - Hit <Enter> to exit_
```

Start of the mgen client
